# Supplementary material for: Seasonality of Influenza and Respiratory Syncytial Viruses and the Effect of Climate Factors in Subtropical–Tropical Asia Using Influenza-Like Illness Surveillance Data, 2010 –2012
Source: PLoS One. 2016 Dec 21;11(12):e0167712. doi: 10.1371/journal.pone.0167712 (PMC5176282; doi:10.1371/journal.pone.0167712)
Supplement: S4 Table — (XLS) [file pone.0167712.s007.xls]

## Sheet: Baguio
Year	week	Sch	samples	fluA	pdm	fluA.full	fluB	rsv	aveT	minT	maxT	RH	AH	SH	rainD>1	rainD>5	rainD>10	rainD>15	rainfall
2010	1	0	46	0	1	1	1	8	18.4778	13.6444	23.3111	86.8889	18.6786	15.9059	0	0	0	0	0
2010	2	0	35	0	0	0	3	3	17.3714	12.3571	22.3714	83.8571	16.8137	14.8278	0	0	0	0	0
2010	3	0	36	0	0	0	1	5	18.6286	13.5857	23.7143	84.4286	18.3301	16.0679	0	0	0	0	0
2010	4	0	35	0	0	0	1	4	17.9143	11.9857	23.8714	82.5714	17.1047	15.334	0	0	0	0	0
2010	5	0	33	0	4	4	1	0	19.4714	13.8	25.1429	83.1429	18.9977	16.9425	0	0	0	0	0
2010	6	0	45	0	0	0	8	4	19.0857	13.6	24.5857	83.1429	18.5521	16.5356	0	0	0	0	0
2010	7	0	40	0	2	2	0	5	18.9714	13.4857	24.4429	84	18.6239	16.412	0	0	0	0	0
2010	8	0	43	0	1	1	3	0	20.0571	14.7714	25.3429	82.8571	19.6552	17.5968	0	0	0	0	0
2010	9	0	38	0	0	0	1	6	19.9429	13.9143	25.9857	80.4286	18.9496	17.4643	0	0	0	0	0
2010	10	0	36	0	0	0	1	1	19.6143	14.9714	24.2571	82.5714	19.0294	17.1072	2	1	0	0	8.3
2010	11	0	42	0	0	0	7	0	20.6429	14.5429	26.7571	79	19.4415	18.2658	0	0	0	0	0
2010	12	0	35	0	2	2	0	2	19.5714	14.6571	25.8571	80.7143	18.6228	17.1227	2	0	0	0	7
2010	13	1	20	0	1	1	0	2	19.7286	14.4	25.3429	80.2857	18.694	17.2538	0	0	0	0	0
2010	14	1	17	0	1	1	0	0	21.8429	16.0143	27.6714	80	21.2684	19.705	0	0	0	0	0
2010	15	1	26	0	0	0	0	1	21.7143	15.4	28.0286	74.5714	19.5809	19.547	1	0	0	0	5
2010	16	1	31	0	2	2	1	2	21.2571	16.1143	26.4	79	20.24	19.0067	0	0	0	0	0
2010	17	1	14	0	1	1	0	3	20.7714	16.2	25.5286	87.4286	21.693	18.4457	5	4	4	3	154.2
2010	18	1	20	0	0	0	0	2	21.7429	16.9857	26.6714	83.7143	22.0849	19.5865	4	1	1	0	17.4
2010	19	1	20	0	1	1	0	0	21.8714	16.7714	26.9857	83.1429	22.0961	19.7359	3	2	1	1	27.4
2010	20	1	20	0	3	3	1	0	21.8714	17.2857	26.4286	83.8571	22.2854	19.7285	3	1	1	0	18.2
2010	21	0	19	0	0	0	0	2	20.7286	15.9857	25.4857	86	21.2768	18.3645	5	5	5	4	128
2010	22	0	17	0	0	0	1	8	19.3	16.4143	22.1857	92.7143	20.9633	16.777	7	6	3	1	75.7
2010	23	0	12	0	0	0	0	0	21.2286	16.7143	25.7429	88.4286	22.6059	18.9699	4	2	2	2	61.8
2010	24	0	22	0	1	1	2	1	21.8	17.2429	26.3429	88	23.297	19.6508	4	3	1	1	72.8
2010	25	0	29	0	1	1	2	4	20.8857	16.4	25.3571	90.2857	22.5742	18.5464	6	3	2	2	66.1
2010	26	0	50	0	6	6	5	6	21.3857	16.9429	26.2286	87.1429	22.4895	19.1442	5	3	2	0	37
2010	27	0	52	2	8	10	4	8	20.4714	15.9714	24.9714	88.5714	21.5438	18.0689	5	5	4	4	142.9
2010	28	0	78	0	17	17	6	11	19.8	15.8429	23.7714	90.7143	21.1812	17.3262	5	3	2	2	105.2
2010	29	0	79	3	8	11	8	22	19.7714	15.9143	23.6	90.4286	21.0842	17.3134	7	6	6	4	145.2
2010	30	0	101	1	18	19	25	12	20.0857	16.0571	24.1	90.1429	21.424	17.6327	7	6	5	3	131
2010	31	0	103	3	20	23	18	15	19.8571	16.2286	23.6857	91	21.3337	17.3673	7	6	6	6	239.4
2010	32	0	112	2	17	19	23	55	19.8	16.4	23.1857	91	21.2475	17.3271	5	4	2	1	73.3
2010	33	0	126	8	16	24	31	45	20.2714	16	24.5286	89.4286	21.4988	17.8362	6	4	3	1	90.4
2010	34	0	123	5	17	22	42	36	19.6	15.9143	23.2571	91.8571	21.1622	17.084	5	4	2	2	58.7
2010	35	0	28	5	2	7	11	5	18.0143	15.8429	20.4143	95.4286	19.9036	15.4441	7	7	6	6	681.4
2010	36	0	11	1	1	2	5	3	19.3429	15.4	23.3	90.4286	20.5127	16.8206	5	3	3	2	73.4
2010	37	0	39	7	1	8	9	7	20.1714	15.4857	24.8714	87.4286	20.8964	17.72	3	3	2	2	56.2
2010	38	0	74	7	0	7	37	5	19.9143	15.8571	24	87.4286	20.5566	17.4331	4	4	4	2	73.6
2010	39	0	64	9	0	9	25	5	20.6714	16.4571	24.8857	87.2857	21.518	18.3125	3	1	0	0	11.1
2010	40	0	40	4	0	4	11	1	20.4143	15.8571	24.9714	87.1429	21.1368	17.9953	5	4	4	2	86
2010	41	1	34	3	0	3	10	1	20.8286	16.2286	25.4286	87.7143	21.8438	18.4784	5	3	1	1	71.3
2010	42	0	5	0	0	0	0	0	18.0143	15.9143	20.1143	95.8571	19.9754	15.4463	7	4	3	3	691.7
2010	43	0	11	0	0	0	0	0	18.8	14.8286	22.7857	89.5714	19.6346	16.2456	4	3	2	2	66.8
2010	44	0	18	0	0	0	1	1	19.3571	15.6857	23	89	20.2114	16.8398	2	1	0	0	11
2010	45	0	23	0	0	0	1	2	19.5	15.6857	23.4	90.4286	20.7379	16.9968	6	5	4	3	141.8
2010	46	0	17	1	0	1	3	0	20.0857	15.3143	24.8571	85.4286	20.3045	17.6234	2	1	1	1	27.4
2010	47	0	40	0	0	0	7	0	19.2143	15.0857	23.3571	88.1429	19.8189	16.6905	4	3	2	2	46.2
2010	48	0	17	0	0	0	0	1	19.9143	14.9571	24.8571	85	19.9889	17.4332	0	0	0	0	0
2010	49	0	23	0	0	0	0	0	18.7571	13.6286	23.8714	86.1429	18.8324	16.216	2	0	0	0	7.2
2010	50	0	17	1	0	1	1	0	19.7571	14.9143	24.5714	85.1429	19.8184	17.2682	1	1	1	1	20.8
2010	51	1	6	0	0	0	0	0	18.3429	13.4857	23.2	86.8571	18.5356	15.7998	0	0	0	0	0.4
2010	52	1	0	0	0	0	0	0	17.8667	13	22.6667	87	17.9546	15.3019	1	1	1	1	19
2011	1	0	39	0	0	0	1	0	17.1875	10.95	23.4625	81.5	16.107	14.6389	0	0	0	0	0
2011	2	0	40	0	0	0	3	0	18.7857	13.9429	23.6714	86	18.85	16.2223	1	0	0	0	2.4
2011	3	0	41	0	0	0	0	1	17.4143	13.2857	21.5286	87.5714	17.6708	14.9431	2	1	0	0	11.8
2011	4	0	41	0	1	1	1	0	17.3	11.8	22.8143	84.5714	16.8624	14.7359	2	2	2	2	79.8
2011	5	0	52	0	0	0	2	0	16.8571	11.4571	22.2429	85.4286	16.5475	14.3652	0	0	0	0	0
2011	6	0	59	0	4	4	0	0	18.9286	13.9857	23.8857	86.8571	19.2052	16.3767	3	2	0	0	13.8
2011	7	0	58	0	6	6	1	1	18.6	13.0286	24.1571	85.1429	18.421	16.0532	0	0	0	0	0
2011	8	0	55	0	6	6	2	2	17.3571	11.3143	23.4143	82.7143	16.5767	14.809	0	0	0	0	0
2011	9	0	33	0	1	1	0	0	19.1857	13.9143	24.4571	81.8571	18.3548	16.6754	2	1	1	1	44.8
2011	10	0	34	0	6	6	0	0	17.7143	12.6	22.8143	87.2857	17.8615	15.139	2	1	1	1	24.5
2011	11	0	54	0	5	5	0	0	19.4429	13.7143	25.1571	82.4286	18.8255	16.9277	0	0	0	0	0
2011	12	0	43	0	4	4	0	0	19.9	13.7714	26.0143	80.7143	19.0063	17.4786	0	0	0	0	0
2011	13	1	35	0	7	7	0	0	18.5857	13.4286	23.6286	86.4286	18.7147	16.0318	2	1	1	1	19.6
2011	14	1	27	0	2	2	0	0	18.2429	12.9286	23.5429	84.8571	17.9331	15.6681	1	0	0	0	3.5
2011	15	1	29	0	1	1	0	0	20.1429	13.7429	26.5429	81	19.3458	17.7064	0	0	0	0	0
2011	16	1	11	0	0	0	0	0	20.2571	14.4286	26.0857	82.7143	19.8776	17.8132	0	0	0	0	1.4
2011	17	1	11	0	0	0	0	0	21.2857	15.3714	27.2143	80.8571	20.7316	19.0194	1	1	0	0	7
2011	18	1	19	0	1	1	0	0	21.7286	15.9143	27.5714	80.7143	21.2518	19.5536	1	0	0	0	4
2011	19	1	21	0	2	2	0	0	19.3	15.5143	23.2714	89.8571	20.3117	16.8318	4	4	2	2	208.2
2011	20	1	26	0	1	1	0	0	20.4286	15.0857	25.7857	87.5714	21.2719	18.0145	4	2	2	2	64
2011	21	0	18	0	0	0	1	0	19.5571	15.2571	23.8571	91.5714	21.0432	17.0457	7	7	6	6	139.8
2011	22	0	13	0	1	1	4	0	20.6571	16	25.3143	87.5714	21.5652	18.2871	3	3	2	1	52.5
2011	23	0	31	0	0	0	0	0	19.9714	15.7714	24.1571	89.1429	21.0382	17.5701	4	2	1	0	27.2
2011	24	0	23	0	0	0	0	0	21.0857	15.6857	26.2571	85	21.5172	18.7828	2	0	0	0	7.6
2011	25	0	11	0	1	1	0	0	17.4857	15.1714	19.8	95.5714	19.2598	14.9248	7	6	6	5	372.1
2011	26	0	28	0	0	0	2	1	19.0429	14.8571	23.2143	92.8571	20.7031	16.5441	5	4	2	2	144.7
2011	27	0	26	0	1	1	1	0	18.7	15.1714	22.2286	93	20.2531	16.1387	6	4	3	2	68.5
2011	28	0	21	0	4	4	0	0	18.1429	14.9429	21.3429	92.7143	19.4955	15.6122	5	4	4	4	94.8
2011	29	0	34	0	5	5	1	0	19.0571	15	23.5857	90.4286	20.1358	16.5344	5	4	2	2	74.8
2011	30	0	17	0	0	0	0	0	18.5286	15.6286	21.4286	93.4286	20.1158	15.9648	7	4	2	2	160.3
2011	31	0	27	0	2	2	0	0	17.9571	15.1714	20.7429	94.5714	19.6397	15.3824	7	7	3	2	198.1
2011	32	0	30	0	12	12	0	0	19.0571	15.2286	22.7286	89.5714	19.9316	16.5302	6	3	2	2	56.9
2011	33	0	56	0	19	19	1	3	20.4571	15.4	25.5143	86.1429	20.9679	18.0453	4	2	1	1	30.4
2011	34	0	55	0	10	10	0	6	19.2143	15.5143	22.9143	92	20.6903	16.7064	6	3	2	2	431.8
2011	35	0	0	0	0	0	0	0	17.5571	15	20.1143	96.2857	19.5059	14.9977	7	7	7	6	516
2011	36	0	29	0	3	3	0	1	19.4143	15.1714	23.6857	91.5714	20.8577	16.8915	6	2	1	1	37.8
2011	37	0	32	0	2	2	0	2	18.7714	15.1429	22.4	92.2857	20.1867	16.2112	6	4	3	3	129.8
2011	38	0	39	2	3	5	0	4	18.5714	14.8286	22.3429	93	20.0833	16.0029	7	6	4	3	153.6
2011	39	0	14	1	1	2	0	2	18.0714	15.6	20.6857	96.1429	20.1051	15.4927	7	5	4	4	514.9
2011	40	0	37	1	2	3	1	12	17.7857	15	21.5429	92.8571	19.0629	15.2217	6	5	2	2	98.6
2011	41	1	45	1	0	1	1	18	18.6286	15.1429	22.0857	91.1429	19.7466	16.0801	3	1	1	0	19.5
2011	42	0	99	13	5	18	2	43	18.9571	14.7857	23.1143	90.4286	20.0146	16.4041	5	3	2	2	67.6
2011	43	0	56	5	0	5	4	25	19.6857	14.3429	25.0286	85.5714	19.8315	17.1789	0	0	0	0	0
2011	44	0	34	3	0	3	2	12	18.8429	14.7143	22.9571	89.2857	19.6199	16.3297	5	2	2	2	42
2011	45	0	51	3	0	3	3	18	19.7571	15.2	24.3429	88.4286	20.5762	17.2892	1	1	1	1	24.8
2011	46	0	41	9	0	9	3	10	19.2571	14.7143	23.7571	87.1429	19.6236	16.7424	1	1	1	0	15.8
2011	47	0	38	3	1	4	1	12	19.3429	14.5429	24.1571	85.2857	19.3482	16.8186	0	0	0	0	0.8
2011	48	0	39	4	0	4	0	6	19.5	14.8571	24.1429	88.1429	20.1762	16.9948	2	2	0	0	19.6
2011	49	0	29	3	0	3	1	4	18.6286	14.4	22.8429	87.5714	18.9779	16.0532	3	2	2	2	42
2011	50	0	23	0	0	0	5	2	19.5714	14.6571	24.1857	85.8571	19.7504	17.0518	0	0	0	0	0
2011	51	1	13	0	1	1	6	1	19.4	14.4857	24.3143	87.4286	19.9236	16.8864	1	0	0	0	5.6
2011	52	1	0	0	0	0	0	0	18.6143	13.4286	23.8286	86	18.6732	16.0771	0	0	0	0	0.8
2012	1	0	23	2	0	2	5	1	18.1857	13.0571	23.3143	86.5714	18.2783	15.619	0	0	0	0	0.2
2012	2	0	39	3	0	3	11	3	18.6143	12.7429	24.3714	83.5714	18.1358	16.0528	0	0	0	0	0
2012	3	0	26	1	0	1	4	0	18.3714	13.1143	23.5143	89.2857	19.0432	15.8247	3	0	0	0	9.6
2012	4	0	29	0	0	0	5	0	18.3571	12.3714	24.3714	86	18.3444	15.7915	0	0	0	0	0
2012	5	0	31	0	0	0	4	0	17.9286	12.7429	23.1143	90.7143	18.8367	15.3807	5	2	0	0	20.5
2012	6	0	33	2	0	2	2	0	17.9286	11.9429	23.9	88	18.2234	15.3548	0	0	0	0	0
2012	7	0	24	2	0	2	2	0	17.9714	14.1571	21.7286	92.8571	19.3084	15.4145	5	3	2	1	62.7
2012	8	0	26	0	0	0	4	1	19.4571	14.0286	24.8857	88.8571	20.3105	16.9484	1	0	0	0	5
2012	9	0	29	1	0	1	2	1	19.7857	13.4286	26.0143	85	19.819	17.2927	0	0	0	0	0
2012	10	0	36	0	0	0	0	0	19.6714	13.9143	25.5143	87.2857	20.2204	17.1847	1	1	1	0	15.6
2012	11	0	37	0	0	0	2	0	18.7	13.7429	23.6571	91.1429	19.8322	16.1348	4	3	3	3	80.8
2012	12	0	30	0	0	0	0	2	20.1857	14.8429	25.5429	88	21.0475	17.7412	1	1	1	0	11.3
2012	13	1	41	1	0	1	0	0	18.0714	12.9714	23.3	90.4286	18.9391	15.5105	2	2	2	1	44.2
2012	14	1	12	1	0	1	0	0	19.7429	14.5429	24.9571	88	20.485	17.255	3	3	2	1	64.4
2012	15	1	16	0	0	0	1	0	20.1571	14.5714	25.9	86.8571	20.7965	17.7437	1	0	0	0	2.8
2012	16	1	30	0	0	0	1	0	21.1143	14.8143	27.4	84.2857	21.3703	18.8095	0	0	0	0	0
2012	17	1	17	0	0	0	0	0	20.9714	15.4571	26.5	86.2857	21.6811	18.6477	1	1	0	0	5.4
2012	18	1	9	0	0	0	0	0	21.4286	15.6714	27.1571	87.5714	22.633	19.2043	1	1	1	1	16
2012	19	1	25	0	0	0	0	0	20.1571	15.3857	24.9	89	21.2337	17.7097	4	3	1	1	44.8
2012	20	1	8	0	0	0	0	0	20.9286	15.5429	26.3286	87.5714	21.9505	18.5952	5	4	3	2	75.4
2012	21	0	22	0	0	0	0	0	20.4143	15.3571	25.4571	87.8571	21.3405	18.0156	3	1	1	0	19.4
2012	22	0	20	0	0	0	0	0	19.8857	15.4571	24.2857	90.8571	21.3204	17.404	7	7	6	5	182.9
2012	23	0	16	0	0	0	0	0	19.8429	15.9286	23.7571	92	21.543	17.3829	7	4	4	3	128.2
2012	24	0	9	0	0	0	0	0	18.4571	15.6	21.3143	93.4286	20.0311	15.879	7	5	5	3	134.6
2012	25	0	15	0	0	0	0	0	19.0571	15.4857	22.5429	92.7143	20.6406	16.566	4	4	3	3	143.8
2012	26	0	29	0	0	0	1	0	18.5286	15.0286	22.0286	92.1429	19.839	15.9794	7	6	5	4	168.4
2012	27	0	40	3	0	3	0	0	19.5714	15.7143	23.4143	92.1429	21.2041	17.0967	5	4	2	1	58.8
2012	28	0	48	10	0	10	0	1	20.3286	15.4857	25.3	90.4286	21.8129	17.8938	6	6	5	4	135.6
2012	29	0	32	9	0	9	0	0	19.1143	15.4571	22.7714	92.5714	20.7547	16.6457	5	3	2	2	137
2012	30	0	59	27	0	27	0	0	18.1571	15.2429	21.0571	94.2857	19.8365	15.5833	6	5	5	4	172.6
2012	31	0	17	9	0	9	0	0	17.8143	15.7429	19.8857	97.5714	20.0822	15.2356	7	7	7	7	1370.8
2012	32	0	45	19	0	19	1	3	17.6	14.7714	20.4429	96.7143	19.6421	15.0322	7	7	7	7	343.4
2012	33	0	30	12	0	12	0	0	18.0429	15.3143	20.7714	95.8571	20.0266	15.4726	6	5	5	5	591.8
2012	34	0	18	9	0	9	0	0	18.5	15.2286	21.7714	93.7143	20.1419	15.9293	5	2	2	2	200.3
2012	35	0	42	18	0	18	3	0	18.3143	15.3143	21.3	95.4286	20.2741	15.7621	7	6	5	3	225.2
2012	36	0	46	7	0	7	3	3	19.9857	16.0857	23.8571	91	21.499	17.5208	4	3	2	1	44.8
2012	37	0	29	6	0	6	0	2	20.1143	15.9286	24.3	90.5714	21.5581	17.6519	4	3	2	2	77.4
2012	38	0	38	8	0	8	0	1	20.2	15.7571	24.5571	91.2857	21.859	17.7539	5	3	1	0	33.4
2012	39	0	38	3	0	3	6	5	20.0857	16.0143	23.8714	90.5714	21.5271	17.6258	3	1	1	0	16.7
2012	40	0	36	1	0	1	0	12	18.5571	15.2	21.9	93.4286	20.1605	15.9982	4	3	1	1	121.8
2012	41	1	37	1	0	1	0	10	19.3286	15	23.6429	89	20.165	16.7878	0	0	0	0	0
2012	42	0	36	1	0	1	1	15	19.5571	14.4429	24.6714	87.1429	20.0295	17.039	0	0	0	0	0
2012	43	0	23	0	0	0	1	11	19.4286	14.6	24.2857	88.1429	20.0725	16.9197	3	2	2	2	50.4
2012	44	0	20	1	0	1	4	6	18.6714	14.5857	24.4286	86.5714	18.9258	16.2066	1	0	0	0	2.6
2012	45	0	35	1	0	1	2	10	19.7	15.0857	24.3143	88.8571	20.6159	17.2066	1	1	1	0	12
2012	46	0	38	0	0	0	3	14	19.6857	14.9857	24.4	88.7143	20.5654	17.1837	1	1	1	1	45.8
2012	47	0	30	0	0	0	4	9	19.9857	14.6286	25.2857	84.7143	20.0009	17.5069	0	0	0	0	0
2012	48	0	33	0	0	0	1	8	19.6714	13.7714	25.5429	84.2857	19.5271	17.163	0	0	0	0	0
2012	49	0	48	0	0	0	6	13	19.8	14.8429	24.7857	88.5714	20.667	17.3141	2	0	0	0	5.6
2012	50	0	27	0	0	0	2	5	19.1857	13.5571	24.7857	87.2857	19.6239	16.6664	1	0	0	0	3.6
2012	51	1	0	0	0	0	0	0	19.4571	13.5286	24.7571	85.7143	19.5781	16.9325	0	0	0	0	0
2012	52	1	0	0	0	0	0	0	18.4778	13.8333	23.8222	86.3333	18.5559	15.9198	1	0	0	0	1.6

## Sheet: EasternVisayas
Year	week	ili	samples	fluA	pdm	fluA.full	fluB	rsv	aveT	minT	maxT	RH	AH	SH	rainfall	rainD>1	rainD>5	rainD>10	rainD>15	SeaLevelP	atmP
2010	1	38	7	0	0	0	0	0	26.3	23.63	28.96	89.51	31.21	21.85	69.8	4	4	3	2	1010.37	1010.07
2010	2	48	13	0	1	1	0	1	25.56	23.77	27.3	90.04	30.01	20.83	226.6	6	3	3	2	1011.94	1011.64
2010	3	40	12	0	0	0	0	2	26.2	23.83	28.53	88.4	30.6	21.6	99	6	3	2	2	1013.66	1013.36
2010	4	53	11	0	1	1	0	4	26.47	23.54	29.37	84.9	29.9	21.95	8.4	3	0	0	0	1013.47	1013.17
2010	5	67	23	0	0	0	0	0	27.16	23.33	30.94	82.53	30.33	22.88	13.7	2	1	1	0	1013.29	1012.99
2010	6	74	20	0	0	0	1	1	27.6	23.8	31.4	83.06	31.32	23.46	3.6	1	0	0	0	1014.29	1014
2010	7	61	25	0	0	0	0	4	28.21	24.77	31.64	81.36	31.83	24.4	0.2	0	0	0	0	1012.5	1012.2
2010	8	39	12	0	1	1	0	0	27.6	23.43	31.76	79.36	29.92	23.52	4	1	0	0	0	1012.01	1011.71
2010	9	53	19	0	1	1	0	1	28.3	24.51	32.07	80.8	31.74	24.53	9	2	1	0	0	1012.79	1012.49
2010	10	33	11	0	0	0	0	0	28.31	24.23	32.36	75.93	29.86	24.53	3.6	2	0	0	0	1014.07	1013.77
2010	11	40	17	0	0	0	0	0	28.09	24.84	31.3	80.03	30.92	24.26	48.2	3	2	2	2	1012.24	1011.94
2010	12	27	7	0	1	1	0	0	28.43	25.04	31.8	79.71	31.58	24.8	12.2	3	1	0	0	1009.43	1009.13
2010	13	23	8	0	0	0	0	0	28.37	25.09	31.66	79.46	31.38	24.67	27.5	4	1	1	1	1011.54	1011.24
2010	14	17	8	0	1	1	0	0	28.23	25.04	31.36	81.57	31.95	24.46	17.1	2	2	1	0	1011.04	1010.74
2010	15	33	17	0	0	0	0	0	28.01	25.06	30.93	80.81	31.2	24.16	29.1	3	3	1	0	1011.37	1011.07
2010	16	23	11	0	2	2	0	0	28.34	25.34	31.33	77.44	30.55	24.63	0	0	0	0	0	1011.13	1010.83
2010	17	30	10	0	2	2	2	0	28.56	25.97	31.13	81.93	32.7	24.94	24.8	3	1	1	1	1011.71	1011.41
2010	18	18	5	0	0	0	0	0	28.61	25.96	31.21	82.24	32.95	25.11	49.2	4	2	2	2	1008	1007.7
2010	19	13	3	0	0	0	0	2	28.64	25.6	31.67	78.1	31.33	25.15	1.4	1	0	0	0	1008.16	1007.86
2010	20	27	11	0	2	2	1	2	29.07	25.94	32.19	76.94	31.69	25.78	8	1	1	0	0	1009.59	1009.29
2010	21	29	8	0	2	2	2	1	29.41	26.99	31.81	79.79	33.52	26.31	32.8	3	1	1	1	1009.74	1009.44
2010	22	27	8	0	0	0	0	0	29.76	26.83	32.67	78.9	33.83	26.88	4.6	1	0	0	0	1008.79	1008.49
2010	23	40	13	0	0	0	1	3	30	27.27	32.7	77.71	33.79	27.26	2.2	1	0	0	0	1009.17	1008.87
2010	24	15	6	0	0	0	0	1	28.57	26.07	31.09	82.7	33.03	25	25.5	3	2	1	0	1010.17	1009.87
2010	25	30	9	0	1	1	1	1	28.43	25.73	31.07	84.51	33.49	24.81	53.8	4	2	2	1	1009.01	1008.71
2010	26	17	5	0	0	0	0	1	29.1	26.09	32.09	83.6	34.47	25.85	36.3	2	2	2	1	1008.79	1008.49
2010	27	33	10	0	1	1	4	0	28.44	25.76	31.09	84.27	33.39	24.81	26.6	4	1	1	1	1010.1	1009.8
2010	28	41	14	0	0	0	5	1	28.13	25.6	30.64	86.59	33.7	24.4	79.6	1	1	1	1	1008.37	1008.07
2010	29	38	16	0	0	0	5	2	27.93	25.23	30.6	87.61	33.69	24.08	47.7	6	3	1	1	1008.74	1008.44
2010	30	27	12	0	0	0	2	0	28.06	25.14	30.94	87.94	34.08	24.23	70.6	4	3	2	2	1009.8	1009.5
2010	31	28	16	0	2	2	5	1	28.74	25.93	31.56	83.04	33.5	25.35	31.3	4	2	1	1	1007.01	1006.71
2010	32	39	12	0	0	0	3	1	28.47	25.67	31.24	83.29	33.07	24.86	30	2	2	1	1	1009.6	1009.3
2010	33	37	12	0	0	0	5	1	27.97	25.16	30.77	87.5	33.74	24.14	48.7	4	3	1	1	1009.1	1008.8
2010	34	41	19	1	0	1	3	7	28.41	25.19	31.61	84.21	33.33	24.79	58.8	4	3	3	2	1008.81	1008.51
2010	35	26	13	2	0	2	2	2	28.69	25.66	31.71	83.51	33.6	25.2	2.8	2	0	0	0	1008.84	1008.54
2010	36	14	11	4	0	4	1	2	28	25.16	30.8	86.37	33.35	24.16	63.1	4	3	3	3	1009.87	1009.57
2010	37	49	16	5	0	5	5	1	28.43	25.47	31.36	85.03	33.66	24.82	18.6	2	2	1	0	1008.77	1008.47
2010	38	47	16	3	0	3	1	2	28.39	25.53	31.21	84.99	33.55	24.77	36.9	2	2	1	1	1009.09	1008.79
2010	39	31	11	3	0	3	0	1	28	25.39	30.6	89.17	34.47	24.22	66.6	6	2	2	1	1007.77	1007.47
2010	40	28	12	2	0	2	1	3	28.09	25.37	30.8	89.47	34.74	24.32	37.1	5	2	1	1	1007.99	1007.69
2010	41	23	13	3	0	3	2	1	28.37	25.04	31.69	86.9	34.32	24.75	82.4	5	3	2	2	1008.2	1007.9
2010	42	32	14	6	0	6	4	0	28.37	25.14	31.6	81.61	32.22	24.78	21.8	2	1	1	1	1006.76	1006.46
2010	43	5	2	1	0	1	0	0	27.73	25.03	30.39	88.83	33.74	23.82	72.7	4	3	2	2	1008.37	1008.07
2010	44	10	8	1	0	1	0	0	27.57	24.97	30.17	89.97	33.86	23.57	125.4	6	3	3	3	1008.49	1008.19
2010	45	33	11	3	0	3	2	2	27.74	25.06	30.41	85.37	32.45	23.8	9.5	3	0	0	0	1010.06	1009.76
2010	46	17	3	0	0	0	0	0	27.11	24.51	29.71	90.79	33.27	22.93	84.6	7	5	3	2	1009.04	1008.74
2010	47	22	12	1	0	1	1	0	27.97	25.21	30.69	87.17	33.6	24.16	36.9	4	2	2	1	1007.77	1007.47
2010	48	16	7	0	0	0	0	1	28.03	25.21	30.81	88.33	34.14	24.29	69.7	6	5	3	2	1007.66	1007.36
2010	49	40	14	0	0	0	2	1	27.64	25.07	30.19	89.69	33.92	23.73	31.4	4	2	1	0	1005.96	1005.66
2010	50	30	14	1	0	1	0	1	28.2	25.26	31.1	84.76	33.12	24.49	26.6	2	2	1	1	1007.89	1007.59
2010	51	24	9	0	0	0	0	1	27.37	24.86	29.91	88.61	32.95	23.33	87.6	5	5	3	3	1006.71	1006.41
2010	52	18	9	0	0	0	0	0	26.42	24.27	28.57	90.68	31.85	21.98	57.2	6	3	2	1	1008.2	1007.9
2011	1	44	10	0	0	0	0	1	25.15	23.68	26.64	90.96	29.54	20.33	295.8	7	5	4	4	1009.28	1008.98
2011	2	39	11	0	0	0	0	0	26.56	24.51	28.59	91.11	32.24	22.26	241.4	6	4	4	4	1006.13	1005.83
2011	3	42	12	0	0	0	0	0	25.84	23.84	27.83	90.76	30.79	21.26	211.3	5	5	4	4	1009.14	1008.84
2011	4	29	9	0	0	0	0	0	26.7	24.4	28.99	86.51	30.92	22.29	177.7	4	4	3	2	1011.53	1011.23
2011	5	35	7	0	0	0	0	0	25.79	24.07	27.47	90.77	30.72	21.2	127.4	7	6	3	2	1009.2	1008.9
2011	6	38	9	0	0	0	0	0	27.6	24.74	30.4	85.84	32.36	23.62	16.4	1	1	1	1	1007.73	1007.43
2011	7	46	13	0	0	0	0	1	27.29	24.57	29.99	87.1	32.24	23.13	54.8	6	5	3	1	1010.96	1010.66
2011	8	32	4	0	0	0	0	0	27	23.77	30.2	81.33	29.6	22.72	50.8	2	1	1	1	1010.36	1010.06
2011	9	43	11	1	2	3	1	0	26.73	24.57	28.87	89.16	31.89	22.42	139.4	5	3	3	2	1008.54	1008.24
2011	10	31	8	0	1	1	0	0	27.3	24.46	30.1	85.56	31.64	23.17	188.2	5	3	2	2	1010.69	1010.39
2011	11	25	6	0	0	0	0	0	25.6	23.83	27.36	92.64	30.96	20.91	704.1	7	7	7	7	1009.79	1009.49
2011	12	12	4	0	0	0	0	0	27.44	24.94	29.91	88.33	32.98	23.4	88.9	6	4	3	3	1008.97	1008.67
2011	13	20	12	0	0	0	0	0	26.6	24.63	28.54	89.1	31.64	22.22	240.7	5	5	5	5	1008.67	1008.39
2011	14	41	14	0	1	1	0	0	27.14	23.74	30.5	79.26	29.08	22.9	13.8	1	1	1	0	1011	1010.7
2011	15	32	8	0	3	3	0	0	27.06	24.59	29.51	85.83	31.34	22.8	36.2	4	2	1	1	1010.3	1010
2011	16	13	3	0	0	0	0	0	27.83	24.89	30.74	83.11	31.76	23.93	27.5	4	2	1	0	1009.27	1008.97
2011	17	35	12	0	2	2	0	0	27.71	25.44	29.97	88.91	33.75	23.77	66.2	6	4	3	2	1008.69	1008.39
2011	18	19	3	0	0	0	0	0	27.07	25	29.11	89.04	32.54	22.92	167.8	7	6	5	5	1007.29	1006.99
2011	19	31	8	0	3	3	0	0	28.47	25.84	31.07	82.96	32.94	24.87	6.3	2	0	0	0	1009.17	1008.87
2011	20	27	10	0	0	0	0	1	28.43	25.94	30.91	85.43	33.85	24.79	34.6	4	3	1	1	1009.54	1009.24
2011	21	44	9	0	0	0	0	0	28.33	25.67	30.96	83.04	32.74	24.77	14.4	5	0	0	0	1005.79	1005.49
2011	22	37	14	0	5	5	0	0	28.33	25.59	31.06	85.53	33.68	24.65	61	3	3	2	2	1009.31	1009.01
2011	23	33	12	0	2	2	0	0	27.79	25.54	29.97	87.33	33.28	23.9	37	5	4	1	0	1008.37	1008.07
2011	24	32	9	0	4	4	0	0	27.69	25.19	30.14	86.76	32.89	23.77	71	4	3	3	2	1008.34	1008.04
2011	25	30	13	0	6	6	0	2	28.33	25.91	30.71	81.93	32.23	24.75	13.2	3	1	0	0	1006.34	1006.04
2011	26	28	14	0	2	2	0	2	28.11	25.26	30.96	85.34	33.18	24.35	95.6	3	3	3	3	1008.5	1008.2
2011	27	28	16	0	1	1	0	0	28.34	25.41	31.24	83.49	32.9	24.7	23.6	3	2	0	0	1008.23	1007.93
2011	28	50	17	0	5	5	0	0	28.67	25.37	32	82.17	32.99	25.24	9.7	2	0	0	0	1007.47	1007.17
2011	29	44	17	0	2	2	0	1	28.36	25.34	31.36	84.74	33.39	24.75	82	5	3	3	2	1007.46	1007.16
2011	30	37	9	0	1	1	0	1	27.29	24.93	29.64	84.97	31.44	23.27	83	7	4	3	2	1005.93	1005.63
2011	31	43	13	0	0	0	0	2	28.99	25.51	32.43	80.77	33.07	25.73	6.1	2	0	0	0	1006.16	1005.86
2011	32	60	12	0	0	0	0	1	28.37	25.37	31.34	83.99	33.13	24.75	27	5	3	0	0	1008.23	1007.93
2011	33	44	8	0	0	0	0	0	27.86	24.79	30.9	88.81	34	23.96	83.2	4	3	2	2	1009	1008.7
2011	34	46	19	0	0	0	0	4	28.51	25.76	31.23	78.01	30.96	25.07	5.3	2	0	0	0	1006.14	1005.84
2011	35	29	13	0	0	0	0	4	29.37	25.87	32.87	79.31	33.22	26.28	15.4	1	1	1	1	1007.89	1007.59
2011	36	51	15	0	0	0	0	5	27.91	25.01	30.77	84.91	32.59	24.07	22.3	3	2	0	0	1008.57	1008.27
2011	37	38	11	0	0	0	0	3	29.36	25.9	32.8	77.67	32.48	26.27	3.2	2	0	0	0	1008.2	1007.9
2011	38	43	14	0	0	0	0	3	28.59	25.66	31.5	84.84	33.9	25.04	96	5	4	3	2	1009.14	1008.84
2011	39	22	9	0	0	0	0	3	29.07	26.1	32.03	75.46	31.05	25.9	26.6	2	1	1	1	1006.04	1005.74
2011	40	49	21	0	0	0	0	7	28.33	25.31	31.33	84.73	33.36	24.68	46.7	5	3	2	1	1008.56	1008.26
2011	41	38	14	0	0	0	0	2	27.79	25.09	30.46	85.76	32.67	23.86	124.7	3	2	2	2	1009.59	1009.29
2011	42	49	12	0	0	0	0	5	28.36	25.2	31.5	83.5	32.95	24.69	1.5	1	0	0	0	1009.29	1008.99
2011	43	26	15	0	0	0	0	5	28.73	25.26	32.16	83.9	33.84	25.28	12.4	3	1	0	0	1008.4	1008.1
2011	44	20	13	0	0	0	3	4	27.91	25.33	30.5	87.73	33.69	24.11	19.8	4	2	0	0	1006.57	1006.27
2011	45	47	25	1	0	1	1	14	28.64	25.51	31.74	85.2	34.21	25.11	25.2	3	1	1	1	1009.67	1009.37
2011	46	44	16	2	0	2	3	4	27.67	25.14	30.2	87.24	33.04	23.74	59.2	5	4	3	1	1009.43	1009.13
2011	47	58	29	2	0	2	11	4	27.7	24.77	30.59	87.9	33.34	23.75	170.6	6	6	5	4	1009.24	1008.94
2011	48	50	18	3	0	3	4	2	28.26	25.53	30.93	86.64	33.97	24.59	31.8	3	2	2	1	1007.41	1007.11
2011	49	62	20	2	0	2	7	4	26.31	24.61	28	92.79	32.4	21.86	188.2	6	6	5	5	1008.2	1007.9
2011	50	55	18	3	0	3	3	4	27.74	25.26	30.17	88.23	33.54	23.83	128.3	6	4	2	2	1008.63	1008.33
2011	51	40	16	1	0	1	2	4	28.04	25	31.07	86.06	33.3	24.3	30.2	4	3	0	0	1008	1007.7
2011	52	22	10	0	0	0	0	0	27.3	24.99	29.61	88.59	32.8	23.16	265.3	5	4	4	4	1011.4	1011.1
2012	1	45	13	0	0	0	4	2	27.14	24.59	29.69	88.31	32.39	22.9	200.6	6	6	6	5	1011.63	1011.33
2012	2	44	21	2	0	2	1	4	26.67	24.43	28.9	91.3	32.53	22.3	260.8	7	6	5	3	1011.19	1010.89
2012	3	38	14	0	0	0	2	0	27.16	24.07	30.21	86.51	31.76	22.98	10.2	3	1	0	0	1008.63	1008.33
2012	4	52	12	1	0	1	0	1	27.39	24.17	30.57	85.51	31.8	23.28	103.4	4	4	4	3	1009.83	1009.53
2012	5	57	15	0	0	0	0	1	26.63	23.56	29.69	85.93	30.55	22.18	51.8	4	3	1	1	1011.69	1011.39
2012	6	34	9	0	0	0	0	0	26.24	24.04	28.4	89.16	30.95	21.74	212.8	7	6	4	4	1010.63	1010.33
2012	7	62	21	0	0	0	0	0	26.31	24.47	28.11	93.46	32.62	21.82	187.5	7	5	4	4	1009.4	1009.1
2012	8	61	18	0	0	0	0	0	27.43	24.59	30.23	86.64	32.33	23.35	46.5	4	3	1	1	1008.93	1008.63
2012	9	53	14	0	0	0	0	0	28.47	25.16	31.8	81.91	32.51	24.9	24.5	3	2	1	0	1008.63	1008.33
2012	10	43	10	0	0	0	0	0	27.5	24.51	30.49	84.16	31.54	23.48	34.5	5	2	1	1	1008.09	1007.79
2012	11	51	13	0	0	0	0	0	27.79	24.4	31.17	81.83	31.18	23.85	28.8	4	2	1	1	1010.83	1010.53
2012	12	36	14	0	0	0	0	0	26.84	24.49	29.14	91.03	32.81	22.55	157	6	6	6	3	1009.23	1008.93
2012	13	35	15	0	0	0	0	0	27.11	24.43	29.79	87.56	32.02	22.93	169.5	4	3	2	2	1010.64	1010.34
2012	14	8	6	0	0	0	0	0	28.47	25.36	31.54	82.66	32.84	24.78	35.4	4	2	2	1	1012.44	1012.14
2012	15	43	15	0	0	0	0	0	28	25.03	30.94	82.37	31.77	24.16	6.4	2	0	0	0	1010.81	1010.51
2012	16	44	14	0	0	0	0	0	28.1	24.8	31.36	79.97	31.04	24.33	9.9	1	1	0	0	1009.04	1008.74
2012	17	42	13	0	0	0	0	0	28.66	25.71	31.6	81.04	32.52	25.14	19.8	2	1	1	0	1009.64	1009.34
2012	18	40	13	0	0	0	0	0	28.44	25.67	31.19	83.34	33.02	24.87	29.4	3	1	1	1	1008.49	1008.19
2012	19	33	14	0	0	0	0	0	28.67	25.51	31.8	82	32.95	25.2	16	2	2	0	0	1008.2	1007.9
2012	20	50	20	0	0	0	0	0	29.11	25.81	32.39	82.77	34.15	25.87	2.9	1	0	0	0	1008.37	1008.07
2012	21	32	11	0	0	0	0	0	29.26	25.39	33.13	82.63	34.39	26.13	143.2	3	3	3	3	1007.14	1006.84
2012	22	44	13	0	0	0	0	0	28.69	25.79	31.54	86.3	34.68	25.28	76.8	5	4	3	1	1006	1005.7
2012	23	15	5	0	0	0	0	1	29.26	25.83	32.67	81.61	33.93	26.15	26.1	2	2	1	1	1006.69	1006.39
2012	24	22	8	0	0	0	0	0	28.53	25.36	31.67	82.56	32.89	25.02	61.9	3	2	2	2	1007.01	1006.71
2012	25	23	12	0	0	0	0	0	29.4	25.51	33.24	77.23	32.39	26.3	5	1	0	0	0	1009.21	1008.91
2012	26	18	7	0	0	0	0	0	28.03	24.96	31.09	81.36	31.48	24.26	19.2	3	1	1	0	1007.87	1007.57
2012	27	19	9	0	0	0	0	0	27.41	24.89	29.9	89.14	33.24	23.42	42.4	5	2	2	1	1006.07	1005.77
2012	28	34	5	0	0	0	0	0	28.04	25.03	31.03	85.8	33.23	24.25	37.7	6	2	1	1	1008.14	1007.84
2012	29	23	7	0	0	0	0	0	28.51	25.51	31.49	82.83	32.99	24.97	14.8	4	1	1	0	1007.86	1007.56
2012	30	27	9	0	0	0	0	0	28.13	25.47	30.77	84.43	32.82	24.48	38	4	2	1	1	1006.39	1006.09
2012	31	22	10	1	0	1	0	0	29	25.97	32.03	73.37	30.08	25.78	4.2	1	0	0	0	1004.9	1004.6
2012	32	28	16	0	0	0	0	0	29.73	25.89	33.53	73.4	31.41	26.86	0	0	0	0	0	1008.2	1007.9
2012	33	23	11	0	0	0	0	0	29.61	26.03	33.17	75.69	32.16	26.69	7.8	1	1	0	0	1007.34	1007.04
2012	34	22	15	0	0	0	0	0	29.11	25.24	32.96	79.19	32.65	25.92	26.9	4	2	1	0	1007.29	1006.99
2012	35	15	8	0	0	0	0	0	28.7	25.19	32.19	82.54	33.2	25.23	71.4	1	1	1	1	1008.89	1008.59
2012	36	19	9	0	0	0	0	0	27.86	24.86	30.86	86.66	33.18	23.99	132.6	5	3	2	2	1008.99	1008.69
2012	37	39	18	1	0	1	0	1	28.37	25.33	31.41	80.74	31.86	24.78	7.5	4	0	0	0	1007.53	1007.23
2012	38	39	17	2	0	2	0	0	28.43	25.36	31.46	82.79	32.72	24.89	113.8	4	2	2	2	1007.54	1007.24
2012	39	20	7	0	0	0	0	0	28.04	25.36	30.7	81.93	31.65	24.35	54	2	1	1	1	1005.99	1005.69
2012	40	19	10	5	0	5	0	0	28.24	24.81	31.66	82.29	32.23	24.54	34.6	5	2	1	1	1008.97	1008.63
2012	41	40	16	3	0	3	0	2	28.46	25.26	31.64	82.23	32.62	24.91	16.6	3	2	0	0	1006.77	1006.47
2012	42	33	18	2	0	2	0	3	28.34	25.19	31.47	83.54	32.89	24.67	57.8	3	3	2	1	1010.44	1010.14
2012	43	26	10	0	0	0	0	3	27.57	25.09	30.06	89.17	33.54	23.61	215.9	7	5	4	4	1007.73	1007.43
2012	44	27	8	0	0	0	0	1	28.41	25.06	31.74	83.73	33.12	24.78	10.7	2	1	0	0	1009.74	1009.44
2012	45	42	13	0	0	0	0	2	27.59	24.9	30.24	88.93	33.47	23.59	141.6	5	5	5	5	1008.94	1008.64
2012	46	38	25	0	0	0	0	7	27.37	24.76	29.97	88.59	32.95	23.32	85.7	5	3	3	3	1009.94	1009.64
2012	47	25	3	0	0	0	0	1	27.97	25.09	30.83	85.14	32.81	24.09	22.9	6	2	0	0	1010.86	1010.56
2012	48	19	13	0	0	0	0	4	28.5	24.63	32.37	78.76	31.34	24.87	0	0	0	0	0	1011.11	1010.81
2012	49	47	24	0	0	0	0	10	27.41	24.66	30.16	86.3	32.16	23.32	71.5	3	2	2	2	1009.93	1009.63
2012	50	13	9	0	0	0	0	6	28.03	24.86	31.19	85.31	33	24.2	23.9	2	2	1	0	1010.21	1009.91
2012	51	36	21	1	0	1	0	12	28.41	25.47	31.29	81.86	32.4	24.78	25.7	3	3	0	0	1009.9	1009.6
2012	52	5	4	0	0	0	0	2	27.1	24.51	29.67	86.94	31.78	22.93	247.3	6	5	4	2	1008.51	1008.21

## Sheet: Okinawa
Year	week	atmP	rainfall	aveT	maxT	minT	RH	AH	SH	rainD>1	rainD>5	rainD>10	rainD>15
2010	1	1013.96	16.5	15.6857	18.3857	12.8429	67.8571	12.1781	11.1007	4	1	0	0
2010	2	1018.03	13	14.9286	18	11.9143	61.8571	10.8479	10.6138	1	1	1	0
2010	3	1018.07	4.5	18.2714	20.8143	15.9286	66.5714	14.3083	13.1405	1	0	0	0
2010	4	1015.06	39.5	18.5857	21.8714	15.8429	73.1429	16.0199	13.4079	3	3	2	1
2010	5	1012.03	28	17.0571	19.1857	15.2429	80.5714	15.8549	12.2059	6	2	0	0
2010	6	1012.49	45.5	19.9286	22.3429	17.3429	81.4286	19.6849	14.779	3	2	2	2
2010	7	1013.61	103.5	15.3571	17.8714	13.1857	70.2857	12.5309	10.941	4	3	1	1
2010	8	1009.04	99.5	20.8143	23.9714	18.0714	76.7143	19.2549	15.5445	3	2	2	2
2010	9	1009.47	3.5	22.7714	25.9286	20.5857	81.7143	23.0803	17.5531	1	0	0	0
2010	10	1015.67	24	17.2286	20.4429	14.2857	67.5714	13.9129	12.4767	1	1	1	1
2010	11	1012.73	11	20.1429	23.4429	17.5714	73.1429	17.7404	14.8927	2	1	0	0
2010	12	1011.21	1.5	19.9429	23.2714	17.1429	66.8571	16.5147	14.8639	1	0	0	0
2010	13	1013.39	57	19.8	22.7857	17.1143	68.2857	16.1921	14.5462	4	3	1	1
2010	14	1008	83	21.3286	23.8714	18.8286	77.1429	19.9172	16.0495	3	2	2	2
2010	15	1012.26	31	20.7571	23.3143	18.5429	76.1429	19.0783	15.4868	1	1	1	1
2010	16	1009.81	7.5	22.7571	25.6143	20.0714	75.4286	21.7861	17.6764	1	1	0	0
2010	17	1011.67	42	20.9	23.9286	17.9857	69.2857	17.298	15.5771	2	1	1	1
2010	18	1004.63	107	24.0714	26.5	22.3571	80.5714	24.6049	19.0988	4	2	2	2
2010	19	1006.44	321.5	21.7571	23.8	19.9714	76.8571	20.2014	16.5205	4	4	4	4
2010	20	1004.41	6	26.2857	28.7571	24.7143	84.4286	29.4335	21.9038	1	1	0	0
2010	21	1003.3	131	23.4857	26.3714	20.8429	76.4286	22.4009	18.4353	4	3	3	2
2010	22	1002.71	23	24.2857	26.9429	22.2429	80.5714	24.859	19.3704	4	3	0	0
2010	23	1003.56	95.5	25.2714	27.9	23.2857	78.8571	25.8005	20.5706	2	1	1	1
2010	24	1003.99	81.5	27.3714	29.5	25.6286	86.2857	32.1259	23.4025	4	4	2	2
2010	25	1004.26	27.5	28.2571	31.0714	26.5286	82.7143	32.4412	24.6777	1	1	1	1
2010	26	1003.56	64.5	28.5429	30.9	26.6571	82.2857	32.8152	25.124	2	2	2	2
2010	27	1003.57	10	29.1286	31.5143	27.6	82.7143	34.1602	26.0108	1	1	0	0
2010	28	1006.83	22.5	29.3143	32.3714	26.9571	74.4286	31.072	26.2225	1	1	1	1
2010	29	1007.06	62	28.2429	30.5857	26.0857	79.8571	31.2489	24.5977	5	2	1	1
2010	30	1005.44	191.5	28.6714	31.0857	26.0714	79.8571	32.0771	25.2814	5	4	4	3
2010	31	1001.17	44	28.9286	31.4857	27.0857	79.4286	32.4093	25.7752	5	4	3	0
2010	32	1004.56	95	28.8143	31.1571	26.8286	80.5714	32.6495	25.5151	4	2	1	1
2010	33	1007.71	32	29.2286	31.9857	26.6714	77	31.9935	26.0605	3	1	1	1
2010	34	1004.14	40.5	28.6286	31.9143	26.2286	78.5714	31.4923	25.2239	7	3	1	1
2010	35	1001.8	183.5	27.8714	30.8286	25.7143	81.7143	31.2778	24.1645	6	4	4	3
2010	36	1006.54	29.5	28.3571	31.2429	26.2	79.8571	31.4833	24.7651	3	1	1	1
2010	37	1004.5	15.5	28.2429	31.8	25.7714	78	30.5703	24.6403	4	1	0	0
2010	38	1007.13	0	27.9714	30.7286	25.9143	68.1429	26.4285	24.1847	0	0	0	0
2010	39	1008.34	103	27.7	30.8429	24.7143	75.5714	28.7038	23.7492	3	3	3	2
2010	40	1007.49	116	25.3143	27.9571	22.5	66.4286	21.879	20.5524	2	2	2	2
2010	41	1008.23	3	26.4571	29.2857	24.5	71.8571	25.3812	22.0437	1	0	0	0
2010	42	1004.47	100.5	26.4571	29.2429	24.1857	84.2857	29.6651	22.1171	4	4	4	3
2010	43	1006.2	80	23.6429	25.5571	21.9143	71	21.1616	18.6215	2	2	2	2
2010	44	1013.1	20	21.9143	23.8143	20.1286	63.4286	16.9588	16.5334	1	1	1	1
2010	45	1013.17	127	21.7857	24.1571	19.3714	65.2857	17.4569	16.434	1	1	1	1
2010	46	1011.19	13	21.2143	23.5	19.5	70	17.8813	15.8642	1	1	1	0
2010	47	1010.1	10.5	20.8429	23.3429	18.0714	65.1429	16.4817	15.5474	1	1	0	0
2010	48	1010.97	32.5	21.3	23.8286	18.5429	70.2857	18.2982	16.0072	2	2	1	1
2010	49	1008.99	20	18.6286	21.4429	15.4857	60	13.2158	13.5392	2	2	1	0
2010	50	1010.11	43.5	18.3286	20.8429	15.6	70.4286	15.4318	13.4869	3	2	2	1
2010	51	1009.5	11.5	17.6429	20.3714	15.5	66.1429	13.5331	12.7648	2	1	0	0
2010	52	1012.74	6.5	14.2714	16.7429	11.5571	55.5714	9.13622	10.1517	2	0	0	0
2011	1	1014.67	11	15.2857	17.4714	12.9429	65.1429	11.3952	10.7917	3	0	0	0
2011	2	1012.67	22	14.5143	16.3857	12.1429	63.8571	10.6961	10.3558	3	1	1	1
2011	3	1014.76	14.5	16.2857	19.4571	13.3571	67.7143	12.7753	11.6096	4	1	0	0
2011	4	1018.44	47.5	14.5571	16.1286	13.1143	67.1429	11.292	10.2578	1	1	1	1
2011	5	1014.14	55.5	15.9857	18.6571	13.3143	67.2857	12.6919	11.4418	2	2	2	2
2011	6	1008.97	30	17.0571	20.0286	14.4143	66	13.2313	12.2867	2	1	1	1
2011	7	1012.03	20.5	16.8	19.3286	14.6571	73.1429	14.3276	12.0122	2	1	1	0
2011	8	1011.73	11	19.1286	22.4714	15.9571	73.5714	16.5743	13.9007	2	1	0	0
2011	9	1012.4	4.5	17.0143	19.6571	14.6857	65.8571	13.4241	12.2597	1	0	0	0
2011	10	1014.17	33.5	16.9857	20.0429	14.3429	59.7143	11.9377	12.1298	2	2	1	1
2011	11	1013.73	2.5	17.8286	20.8	15.3571	65.1429	14.0386	12.9386	1	0	0	0
2011	12	1014.59	4	16.7714	18.6714	15.2286	66.8571	13.4601	12.054	1	0	0	0
2011	13	1014	0	18.3429	21.5	15.4857	57.2857	12.2937	13.1948	0	0	0	0
2011	14	1012.93	1.5	20.4714	23.5714	17.9571	68.1429	16.6612	15.1361	1	0	0	0
2011	15	1008.49	7	20.8286	23.7429	18.2143	73	18.4787	15.5812	1	1	0	0
2011	16	1009.33	17.5	19.3714	22.7286	16.1714	60.2857	13.8343	14.1761	1	1	1	1
2011	17	1007.01	69.5	21.6143	24	19.5429	79.7143	21.079	16.3519	4	4	2	1
2011	18	1005.89	34	23.8286	26.6429	21.8286	90.5714	27.2946	18.8871	3	2	2	2
2011	19	1005.93	46	23.7429	25.5714	21.6857	81.1429	24.8129	18.8034	5	1	1	1
2011	20	1005.96	142.5	23.0857	26.0143	21.1286	87	25.0649	18.0336	3	3	2	2
2011	21	1002.29	71.5	24.9857	27.2143	22.8857	87.2857	28.18	20.2578	5	4	3	2
2011	22	1005.06	132.5	25.0143	28.1857	22.5429	83.4286	27.0901	20.2623	3	3	2	2
2011	23	1003.94	0	27.8571	30.5286	26.3714	86.4286	33.088	24.0864	0	0	0	0
2011	24	1004.26	1	28.9143	31.6857	27.1714	82.8571	33.7854	25.6609	0	0	0	0
2011	25	1001.29	80	28.5429	30.9	26.3857	83.2857	33.2185	25.1887	5	3	2	1
2011	26	1005.59	10	28.3429	31.1857	26.4143	83.5714	32.9404	24.7518	2	1	0	0
2011	27	1002.41	12.5	28.6714	31.4714	26.6429	80	32.1627	25.3318	3	0	0	0
2011	28	1001.83	33	28.5143	31.6286	26.1143	80.1429	31.8917	25.1231	2	1	1	1
2011	29	997.757	34	29.3286	32.1286	27.1571	83.2857	34.8116	26.4778	4	1	1	1
2011	30	1004	31.5	29.0857	32.0857	27.2571	78.1429	32.1696	25.9359	1	1	1	1
2011	31	989.157	449	28.1286	30.1571	26.6143	82.5714	31.9709	24.8934	3	3	3	3
2011	32	1005.59	0	27.5571	30.6143	25.7857	82.8571	31.2114	23.616	0	0	0	0
2011	33	1007	2.5	28.5	31.7571	26.4286	79.7143	31.7165	24.9524	1	0	0	0
2011	34	1002.19	12	28.9429	32.0714	26.6429	78.2857	31.979	25.7529	3	0	0	0
2011	35	998.257	8	28.9571	31.9571	26.9	74.8571	30.629	25.8838	2	1	0	0
2011	36	1003.63	38.5	28.3571	31.7143	25.7857	73.8571	29.1307	24.8335	2	1	1	1
2011	37	997.486	26.5	28.4857	30.8429	26.2286	80.4286	31.9688	25.1716	5	2	1	0
2011	38	1002.89	6.5	26.4571	28.7286	24.7	71	25.1954	22.1684	2	0	0	0
2011	39	1006.89	0	27.3429	30.4286	25.6429	78.7143	29.2547	23.2798	0	0	0	0
2011	40	1009.21	103.5	25.5429	27.4571	24.0571	80.2857	26.8172	20.8131	3	3	1	1
2011	41	1008.51	107.5	25.4857	28.2286	23.5429	86.5714	28.7539	20.7499	4	4	3	3
2011	42	1008.53	1	25.0143	27.9429	22.9714	75.1429	24.3459	20.184	0	0	0	0
2011	43	1009.83	0	24.2857	27.3	22.0714	70.5714	21.808	19.2339	0	0	0	0
2011	44	1010.51	77	26.1	28.3714	24.5714	83.5714	28.7854	21.4943	4	4	4	2
2011	45	1007.3	152	24.3714	26.6571	22.5143	83	25.7549	19.3996	3	3	2	2
2011	46	1012.63	39	24.0143	25.5571	22.4	74.1429	22.7022	18.9367	4	2	2	2
2011	47	1016.66	0	20.9857	23.2714	18.7571	58.7143	14.9203	15.5809	0	0	0	0
2011	48	1008.67	47.5	21.8	23.9	20.0286	76.7143	20.6239	16.5315	4	3	2	2
2011	49	1014.7	16	19.7857	22.0714	17.4714	73.8571	17.5074	14.5903	4	1	0	0
2011	50	1015.64	28.5	18.3	20.0714	16.6857	74	15.8419	13.1661	4	2	1	0
2011	51	1014.33	22	17.4286	19.4714	15.4714	63.4286	12.899	12.4861	3	2	1	0
2011	52	1017.44	2.5	17.0571	19.5714	14.5	65.8571	12.9505	12.0903	1	0	0	0
2012	1	1017.06	5	16.1	17.9429	14.4143	67.5714	12.5418	11.39	2	0	0	0
2012	2	1014.47	19	17.6	19.5	15.9714	76	15.6232	12.5932	3	1	1	0
2012	3	1008.63	41.5	18.2714	20.1571	16.7286	70.8571	15.049	13.2029	3	2	1	1
2012	4	1012.31	52.5	16.3429	18.6429	14.2286	68.8571	13.2325	11.7359	4	2	1	1
2012	5	1015.2	2.5	15.9571	18.1857	13.7714	66.8571	12.3728	11.3684	1	0	0	0
2012	6	1013.36	11.5	17.1714	19.9571	14.6429	70.8571	14.3573	12.3637	1	1	0	0
2012	7	1013.51	4.5	17.5571	19.9571	16.0286	72.2857	15.4307	12.8082	1	0	0	0
2012	8	1008.79	76	18.6143	20.9286	16.7286	82.4286	18.1121	13.5535	6	2	1	1
2012	9	1009.69	29	19.8429	22.7714	17.5429	81.5714	19.2918	14.6434	3	2	2	1
2012	10	1007.4	35	20.2429	22.4857	18.6286	80.8571	19.7684	15.1186	5	2	1	1
2012	11	1013.67	12	19.2	21.7286	17.0714	69.1429	16.2576	14.1512	2	1	0	0
2012	12	1011.31	18.5	19.3143	21.9571	16.9143	70.7143	16.5528	14.1992	2	1	1	1
2012	13	1017.1	2.5	18.7143	22.5429	14.8571	54.1429	11.9073	13.507	1	0	0	0
2012	14	1013.04	1.5	19.3	22.6429	16.1714	62.2857	14.1681	14.0306	0	0	0	0
2012	15	1008.14	42.5	22.6714	25.5143	20.5571	80.1429	22.5016	17.4456	5	1	1	1
2012	16	1005.53	220	22.0571	24.2429	20.0143	81.4286	21.9533	16.8236	6	5	5	3
2012	17	1006.7	73	22.6857	25.3	19.9714	78.7143	22.3731	17.5454	5	4	3	2
2012	18	1002.27	51.5	24.0429	26.5857	21.6714	77	23.7018	19.1355	2	2	2	2
2012	19	1004.4	27	24.0286	27	21.6143	71.8571	21.8748	19.0336	2	1	1	1
2012	20	1003.16	161.5	24.7714	27.0571	22.8571	86.7143	27.6809	19.9893	5	4	4	4
2012	21	1003.21	0	24.5143	27.3571	22.3143	72.8571	22.8058	19.6413	0	0	0	0
2012	22	1003.47	60	25.2286	27.8857	23.7286	84.8571	27.8054	20.5314	4	2	1	1
2012	23	997.714	37.5	26.4286	28.6857	24.6857	86.1429	30.3713	22.2371	4	3	2	0
2012	24	998.814	75.5	26.8571	29.1571	25.3857	88.5714	31.9448	22.8186	3	3	2	2
2012	25	1000.03	208	26.8714	29.1286	25.1857	88	31.7476	22.7722	4	4	4	3
2012	26	1004.64	0	28.3714	31.2429	26.6143	80.2857	31.7101	24.8202	0	0	0	0
2012	27	1003.56	0	29.1429	32.1714	27.3	79.4286	32.8465	26.0356	0	0	0	0
2012	28	1001.94	40.5	28.8	30.8429	27.0714	83.8571	33.9452	25.5763	2	1	1	1
2012	29	1002.64	41.5	29.0429	31.8857	26.7857	79.8571	32.8098	25.9034	4	2	2	1
2012	30	1003.51	3.5	29.4286	32.3714	27.4571	74.4286	31.2994	26.4819	1	0	0	0
2012	31	993.429	160.5	28.5	30.6286	26.2286	81.8571	32.5099	25.3166	7	4	1	1
2012	32	997.743	195.5	28.5857	31.1143	26.4	82.5714	33.0043	25.3271	5	5	3	3
2012	33	1003.21	12	29.2	32.5429	26.9286	78.8571	32.7061	26.1298	1	1	0	0
2012	34	996.029	126.5	28.5857	31.1571	26.4714	80	31.9174	25.3844	4	4	3	2
2012	35	1001.99	190	27.8286	30.5	26.0143	81	30.9683	24.0856	2	2	2	2
2012	36	1008.46	8	28.3	31.5714	26.0714	76.8571	30.2254	24.619	3	0	0	0
2012	37	1000.6	153.5	27.3571	30.3143	25	80.1429	29.7301	23.4503	4	3	3	3
2012	38	1005.06	10	26.7143	29.5	24.4	73.2857	26.267	22.4563	2	1	0	0
2012	39	1000.73	100	26.2714	28.5143	24.3143	73	25.4888	21.9653	2	2	2	1
2012	40	1006.46	0	25.1429	27.8143	23	62.8571	20.4753	20.3442	0	0	0	0
2012	41	1002.9	7	25.6857	28.2714	24.0714	74.8571	25.1804	21.1188	2	0	0	0
2012	42	1006.26	80	24.5714	27	22.5286	69.8571	22.2648	19.7162	1	1	1	1
2012	43	1011.84	0	24.2429	27.2571	21.8286	70.8571	21.9359	19.1729	0	0	0	0
2012	44	1010.96	80	21.5143	24.0857	19.7286	67.7143	17.5876	16.1819	2	2	1	1
2012	45	1010.81	41.5	22	24.6429	19.5	66.7143	18.075	16.7041	1	1	1	1
2012	46	1013.01	28.5	20.6143	23.0857	18.5429	62.8571	15.4954	15.2354	1	1	1	1
2012	47	1010.84	20.5	20.8	23.3286	18.0286	68.2857	17.226	15.4848	2	2	1	0
2012	48	1010.09	105	19.9143	22.6286	17.6714	77.7143	18.3744	14.6386	6	5	4	3
2012	49	1012.29	43	18.1571	20.3714	16.2286	61.7143	13.0647	13.0605	1	1	1	1
2012	50	1014.2	1	19.5286	22	17.5429	65	15.2792	14.3588	0	0	0	0
2012	51	1014.26	3.5	18.3429	20.4571	16.1714	65	13.9822	13.2424	1	0	0	0
2012	52	1014.83	14	18.3857	21.5143	15.9	64.4286	14.0578	13.3096	2	1	1	0

## Sheet: DataDictionary
	Variable names	Description
	week	Epidemiological week
	samples	No. of samples collected
	fluA	No. of confirmed influenza A cases
	pdm	No. of confirmed influenza A/H1N1pdm cases
	fluA.full	Total no. of influenza A cases (A/H3N2 and A/H1N1pdm)
	fluB	No. of confirmed influenza A cases
	rapidkit	No. of rapid testkit positive cases
	SeaLevelP	Sea-level pressure
	atmP	Atmospheric pressure
	rainfall	Amount of rainfall (mm)
	aveT	Average temperature (°C)
	maxT	Maximum temperature (°C)
	minT	Minimum temperature (°C)
	RH	Relative humidity (%)
	AH	Absolute humidity (g/m3)
	SH	Specific humidity (g/kg)
	rainD>1	No. of days with rainfall > 1mm
	rainD>5	No. of days with rainfall > 5mm
	rainD>10	No. of days with rainfall > 10mm
	rainD>15	No. of days with rainfall > 15mm
	For influlenza data in Okinawa, following site include the contact address as well as the latest information about influenza in Okinawa Prefecture
	http://www.pref.okinawa.jp/site/hoken/eiken/kikaku/kansenjouhou/influ.html
	For climate data in Okinawa, Japan Meterology Agency has a copiright and the latest information
	http://www.data.jma.go.jp/gmd/risk/obsdl/index.php (in Japanese)
	For climate data in the Philippines, Philippines Atomospheric geophysical and astronomical services administration has a copiright and the latest information
	http://www.pagasa.dost.gov.ph/
